# Supplementary material
Source: PubMed Central journal article supplement (PMC8577332)
Supplement: mmc1.pdf [file mmc1.pdf]

**Table S1. Characteristics of children with COVID-19 across their clinical spectrum.**

| Characteristics                              | Asymptomatic<br>(n=29) | Mild<br>(n=102)        | Moderate<br>(n=43)      |
|----------------------------------------------|------------------------|------------------------|-------------------------|
| Age, years                                   | 7 (1-10)               | 3 (0.5-11)             | 4 (1-11)                |
| <1, n (%)                                    | 6 (21)                 | 31 (30)                | 9 (9)                   |
| 1-5, n (%)                                   | 10 (34)                | 29 (28)                | 13 (30)                 |
| 6-10, n (%)                                  | 10 (34)                | 16 (16)                | 7 (7)                   |
| >10, n (%)                                   | 3 (10)                 | 26 (25)                | 14 (14)                 |
| Female, n (%)                                | 13 (45)                | 46 (45)                | 21 (49)                 |
| SARS-CoV-2 PCR positive, n (%)               | 29 (100)               | 102 (100)              | 43 (100)                |
| SARS-CoV-2 IgG antibody positive, n (%)      | 7 (24)                 | 31 (30)                | 15 (35)                 |
| SARS-CoV-2 IgM antibody positive, n (%)      | 15 (52)                | 36 (35)                | 17 (40)                 |
| Close contact positive, n (%)                | 5 (17)                 | 87 (85)                | 25 (58)                 |
| Laboratory                                   |                        |                        |                         |
| WBC counts, 10 <sup>3</sup> /mm <sup>3</sup> | 5,305<br>(4,675-5,925) | 6,160<br>(4,925-8,975) | 8,230<br>(5,575-10,288) |
| Neutrophils, %                               | 49 (37-62)             | 38 (28-51)             | 54 (33-70)              |
| Lymphocytes, %                               | 37 (30-45)             | 45 (34-58)             | 33 (16-46)              |
| Neutrophil-to-lymphocyte ratio               | 1 (0.9-2)              | 0.9 (0.5-1)            | 2 (0.8-4)               |
| Coinfections, n (%)                          |                        |                        |                         |
| None                                         | 28 (97)                | 97 (95)                | 41 (95)                 |
| Bacterial <sup>a</sup>                       | 1 (3)                  | 5 (5)                  | 2 (5)                   |
| Viral                                        | 0                      | 0                      | 0                       |
| Comorbidities, n (%)                         |                        |                        |                         |
| None                                         | 27 (94)                | 95 (93)                | 14 (32)                 |
| Heart disease                                | 0                      | 0                      | 1 (2)                   |
| Renal disease                                | 0                      | 0                      | 2 (5)                   |
| Lung disease                                 | 1 (3)                  | 3 (3)                  | 16 (37)                 |
| Prematurity                                  | 0                      | 0                      | 3 (7)                   |
| Autoimmunity                                 | 0                      | 1 (1)                  | 2 (5)                   |
| Cancer                                       | 1 (3)                  | 1 (1)                  | 2 (5)                   |
| Obesity                                      | 0                      | 1 (1)                  | 3 (7)                   |
| Diabetes                                     | 0                      | 1 (1)                  | 0                       |
| PICU admission, n (%)                        | 0                      | 0                      | 2 (5)                   |
| Medications, n (%)                           |                        |                        |                         |
| None                                         | 28 (97)                | 97 (95)                | 23 (53)                 |
| Corticosteroid                               | 0                      | 0                      | 18 (42)                 |
| IVIg                                         | 0                      | 0                      | 0                       |
| Antibiotic                                   | 1 (3)                  | 5 (5)                  | 2 (5)                   |
| Enoxaparin                                   | 0                      | 0                      | 0                       |
| Aspirin                                      | 0                      | 0                      | 0                       |
| Inotropic                                    | 0                      | 0                      | 0                       |

|                           |          |          |         |
|---------------------------|----------|----------|---------|
| Respiratory status, n (%) |          |          |         |
| Mechanical ventilation    | 0        | 0        | 0       |
| Oxygen requirement        | 0        | 2 (2)    | 26 (60) |
| Room air                  | 29 (100) | 100 (98) | 17 (40) |

Data are expressed as median values (25th–75th percentile) unless otherwise indicated. Abbreviations: IVIG, Intravenous Immunoglobulin; PICU, pediatric intensive care unit; WBCs, white blood cells. <sup>a</sup> Types of bacterial co-infection includes urinary tract infections (*E. coli* and *K. pneumoniae*), catheter-related infection with bloodstream infection (*S. hominis*), tuberculosis (*M. tuberculosis*), pneumonia and appendicitis.

**Table S2. Characteristics of MIS-C cohort**

| Characteristics                              | P1   | P2        | P3        | P4   | P5        | P6   | P7   | P8   | P9   | P10  | P11  | P12  | P13       | P14  | P15  | P16  | P17       | P18  | P19  | P20  | P21  |
|----------------------------------------------|------|-----------|-----------|------|-----------|------|------|------|------|------|------|------|-----------|------|------|------|-----------|------|------|------|------|
| <b>Age (y)</b>                               | 4    | 7         | 5         | 5    | 0.6       | 3    | 13   | 12   | 12   | 8    | 7    | 0.6  | 10        | 5    | 11   | 6    | 2         | 1    | 6    | 11   | 1    |
| <b>Gender</b>                                | M    | M         | M         | M    | M         | M    | M    | M    | M    | M    | F    | F    | F         | M    | M    | M    | F         | M    | M    | M    | F    |
| <b>Comorbidities</b>                         |      |           |           |      |           |      |      |      |      |      |      |      |           |      |      |      |           |      |      |      |      |
| <b>Lung disease</b>                          | No   | No        | Yes       | No   | No        | No   | No   | No   | No   | Yes  | No   | No   | No        | No   | No   | Yes  | Yes       | No   | No   | No   | No   |
| <b>Obesity</b>                               | No   | No        | No        | No   | No        | Yes  | No        | No   | No   | No   | No        | No   | No   | No   | No   |
| <b>Presentation</b>                          |      |           |           |      |           |      |      |      |      |      |      |      |           |      |      |      |           |      |      |      |      |
| <b>Fever</b>                                 | Yes  | Yes       | Yes       | Yes  | Yes       | Yes  | Yes  | Yes  | Yes  | Yes  | Yes  | Yes  | Yes       | Yes  | Yes  | Yes  | Yes       | Yes  | Yes  | Yes  | No   |
| <b>Rash</b>                                  | Yes  | No        | No        | No   | Yes       | Yes  | Yes  | Yes  | No   | No   | Yes  | No   | No        | No   | No   | No   | No        | Yes  | Yes  | No   | No   |
| <b>Conjunctivitis</b>                        | No   | No        | No        | No   | No        | No   | No   | No   | No   | No   | No   | Yes  | No        | No   | No   | No   | Yes       | Yes  | No   | No   | No   |
| <b>Pneumonia</b>                             | No   | No        | No        | No   | No        | No   | No   | No   | Yes  | No   | No   | No   | Yes       | Yes  | No   | No   | No        | No   | No   | No   | No   |
| <b>Gastrointestinal</b>                      | No   | No        | Yes       | Yes  | No        | No   | Yes  | Yes  | No   | No   | Yes  | No   | Yes       | Yes  | Yes  | Yes  | No        | Yes  | No   | Yes  | Yes  |
| <b>Shock</b>                                 | Yes  | No        | No        | Yes  | No        | No   | No   | No   | No   | No   | No   | No   | Yes       | Yes  | Yes  | No   | No        | No   | No   | No   | No   |
| <b>Cardiac Abnormalities</b>                 | Yes  | No        | No        | Yes  | No        | Yes  | Yes  | No   | No   | Yes  | No   | No   | Yes       | Yes  | Yes  | No   | Yes       | No   | Yes  | Yes  | Yes  |
| <b>Haematological</b>                        | Yes  | Yes       | No        | Yes  | Yes       | Yes  | Yes  | Yes  | No   | Yes  | No   | No   | Yes       | No   | Yes  | No   | Yes       | No   | No   | No   | Yes  |
| <b>SARS-CoV-2 PCR</b>                        | Pos  | Pos       | Pos       | Neg  | Pos       | Neg  | Neg  | Neg  | Pos  | Pos  | Neg  | Neg  | Pos       | Neg  | Neg  | Neg  | Pos       | Neg  | Neg  | Pos  | Pos  |
| <b>SARS-CoV-2 IgG</b>                        | Pos  | Pos       | Neg       | Pos  | Neg       | Pos       | Pos  | Pos  | Pos  | Pos       | Pos  | Pos  | Pos  | Pos  |
| <b>Prior SARS-CoV-2 Exposure<sup>a</sup></b> | Yes  | not known | not known | Yes  | not known | Yes  | not known | Yes  | Yes  | Yes  | not known | Yes  | Yes  | Yes  | Yes  |
| <b>Medication</b>                            | CS   | CS        | CS        | CS   | CS        | CS   | CS   | CS   | CS   | CS   | CS   | CS   | CS        | CS   | CS   | CS   | CS        | CS   | CS   | CS   | CS   |
|                                              | IVIG | IVIG      | IVIG      | IVIG | IVIG      | IVIG | IVIG | IVIG | IVIG | IVIG | IVIG | IVIG | IVIG      | IVIG | IVIG | IVIG | IVIG      | IVIG | IVIG | IVIG | IVIG |
|                                              | ENX  | ATB       | ENX       | ENX  | ENX       | ENX  | ENX  | ASA  |      | ENX  | ENX  |      | ATB       | ENX  | INO  | ENX  | ENX       | ENX  | ENX  | ENX  | ENX  |
|                                              | ASA  | INO       | ASA       | ASA  | ASA       | ASA  | ASA  |      |      | ASA  | ASA  |      | INO       | ASA  |      | ASA  | ASA       | ASA  | ASA  | ASA  | ASA  |
|                                              | INO  |           |           | INO  |           |      |      | INO  |      | INO  | INO  |      |           |      | INO  |      |           |      |      |      |      |
| <b>PICU admission</b>                        | Yes  | Yes       | No        | Yes  | No        | No   | Yes  | No   | Yes  | Yes  | Yes  | No   | Yes       | Yes  | Yes  | No   | Yes       | No   | No   | Yes  | No   |
| <b>MV</b>                                    | No   | No        | No        | No   | No        | No   | Yes  | No   | No   | Yes  | No   | No   | Yes       | Yes  | Yes  | No   | No        | No   | No   | No   | No   |
| <b>Outcome<sup>b</sup></b>                   | Fav  | Fav       | Fav       | Fav  | Fav       | Fav  | Fav  | Fav  | Fav  | Fav  | Fav  | Fav  | Fav       | Fav  | Fav  | Fav  | Fav       | Fav  | Fav  | Fav  | Fav  |

Abbreviations: ATB, antibiotic; ASA, aspirin; CS, corticosteroid; ENX, enoxaparin; F, female; Fav, favourable; INO, inotropic; IVIG, Intravenous Immunoglobulin; M, male; MV, mechanical ventilation; PICU, pediatric intensive care unit. <sup>a</sup> Prior exposure denotes prior positive SARS-CoV-2 PCR and/or positive close contact history. <sup>b</sup> Outcome refers to the disease course.

**Table S3. Characteristics of children recovered from COVID-19**

| Characteristics                         | Recovered (n=8) |
|-----------------------------------------|-----------------|
| Age, years                              | 4 (0.6-12)      |
| Female, n (%)                           | 3 (38)          |
| Prior SARS-CoV-2 PCR positive, n (%)    | 8 (100)         |
| SARS-CoV-2 IgG antibody positive, n (%) | 7 (88)          |
| Comorbidities, n (%)                    |                 |
| None                                    | 5 (64)          |
| Heart disease                           | 1 (12)          |
| Lung disease                            | 0               |
| Cancer                                  | 1 (12)          |
| Diabetes                                | 1 (12)          |
| Prematurity                             | 0               |
| Days post illness onset                 | 30 (26-32)      |
| Severity at hospital admission          |                 |
| Asymptomatic                            | 0               |
| Mild                                    | 6 (75)          |
| Moderate                                | 2 (25)          |
| Outcome <sup>a</sup>                    |                 |
| Discharged                              | 8 (100)         |
| Hospitalized                            | 0               |

Data are expressed as median values (25th–75th percentile) unless otherwise indicated. <sup>a</sup> Outcome refers to the clinical result of illness.

**Figure S1**

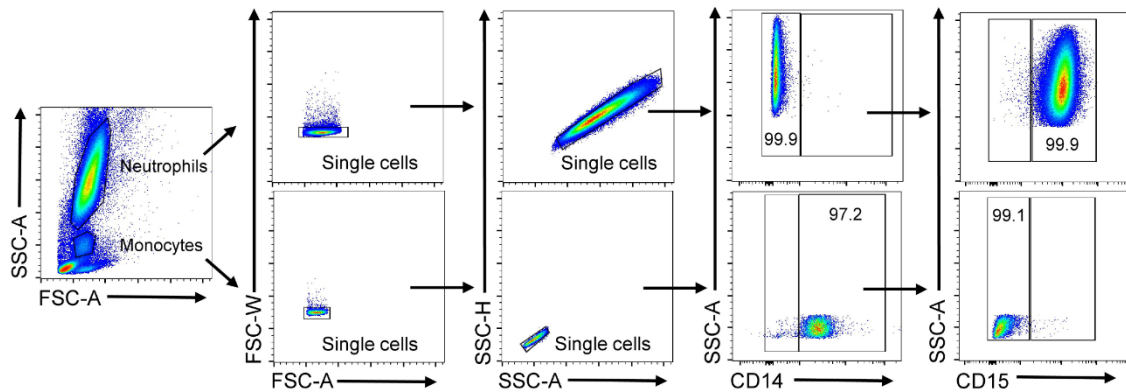

**Legend to Figure S1. Gating strategy to analyze neutrophil phenotype.** Representative FACS profile showing the gating strategy for neutrophils. Whole blood (100  $\mu$ L) was stained with the antibody cocktail mix (anti-CD14 and anti-CD15) for 20 min at room temperature. Then, erythrocytes were lysed and cells were fixed. Data were acquired using a FACSCanto II (Becton Dickinson) and analyzed with FlowJo software. FSC-A vs SSC-A allows the preliminary identification of monocytes and neutrophils. From that, FSC-A vs FSC-W and SSC-A vs SSC-H single cells are gated. A new gating for SSC-A vs CD14 allows to obtain the CD14<sup>-</sup> and CD14<sup>+</sup> population. Next, the CD15<sup>+</sup> and CD15<sup>-</sup> population were gated. Neutrophils were defined as CD14<sup>-</sup>CD15<sup>+</sup> cells. From this population the markers can be investigated for percentages of positive markers and MFI. This gating strategy was used in Fig. 1, 2, 4 a-d, 5 c and Fig. S2.

Figure S2

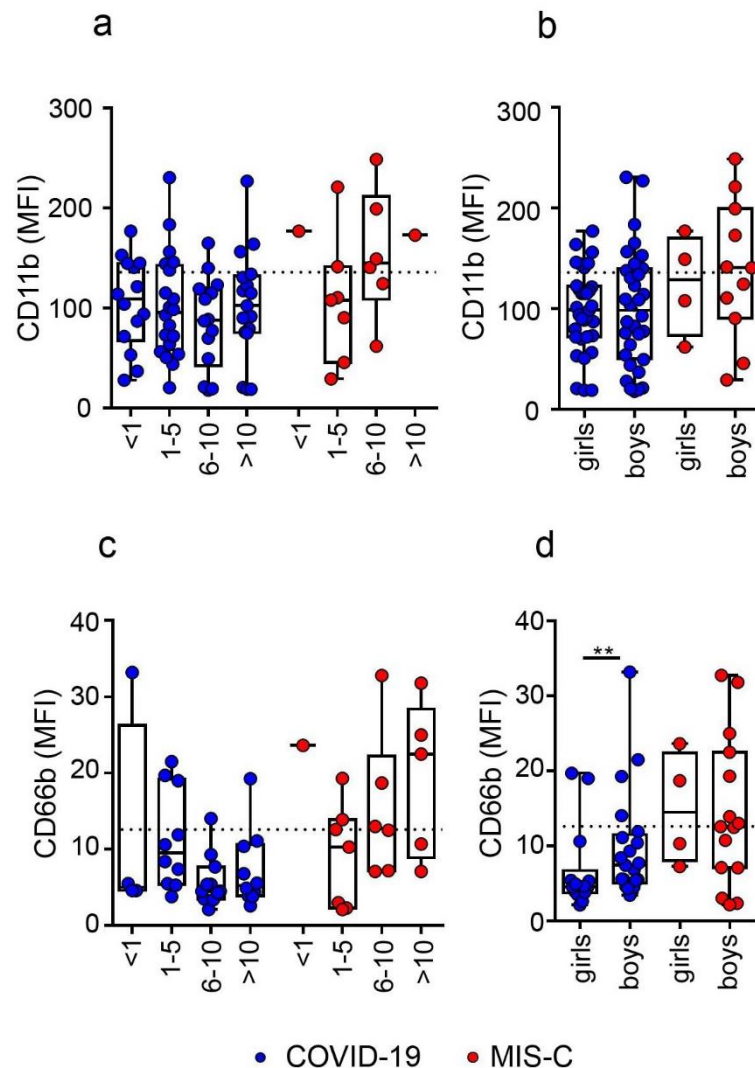

**Legend to Figure S2. Expression of CD11b and CD66b in neutrophils from children with COVID-19 and MIS-C divided according to their age and sex. (a-b)** CD11b expression in neutrophils from children with COVID-19 and MIS-C. **(a)** <1 year, n=14 and n=1; 1 to 5 years, n=20 and n=7; 6 to 10 years, n=14 and n=6; and >10 years, n=17 and n=1; for children with COVID-19 and MIS-C, respectively. **(b)** Girls, n=33 and n=32; boys, n=4 and n=11, for COVID-19 and MIS-C, respectively. **(c-d)** CD66b expression in neutrophils from children with COVID-19 and MIS-C. **(c)** <1 year, n=4 and n=1; 1 to 5 years, n=10 and n=7; 6 to 10 years, n=11 and n=6; and >10 years, n=10 and n=5; for children with COVID-19 and MIS-C, respectively. **(d)** Girls, n=14 and n=4; boys, n=21 and n=15, for COVID-19 and MIS-C, respectively. Dotted line depicts the median expression of markers in neutrophils from healthy controls. Median and min to max of n donors are shown in a-d. P values were determined by Kruskal-Wallis test and Mann-Whitney U test: \*\* p<0.01. COVID-19 (blue circle), MIS-C (red circle).

**Figure S3**

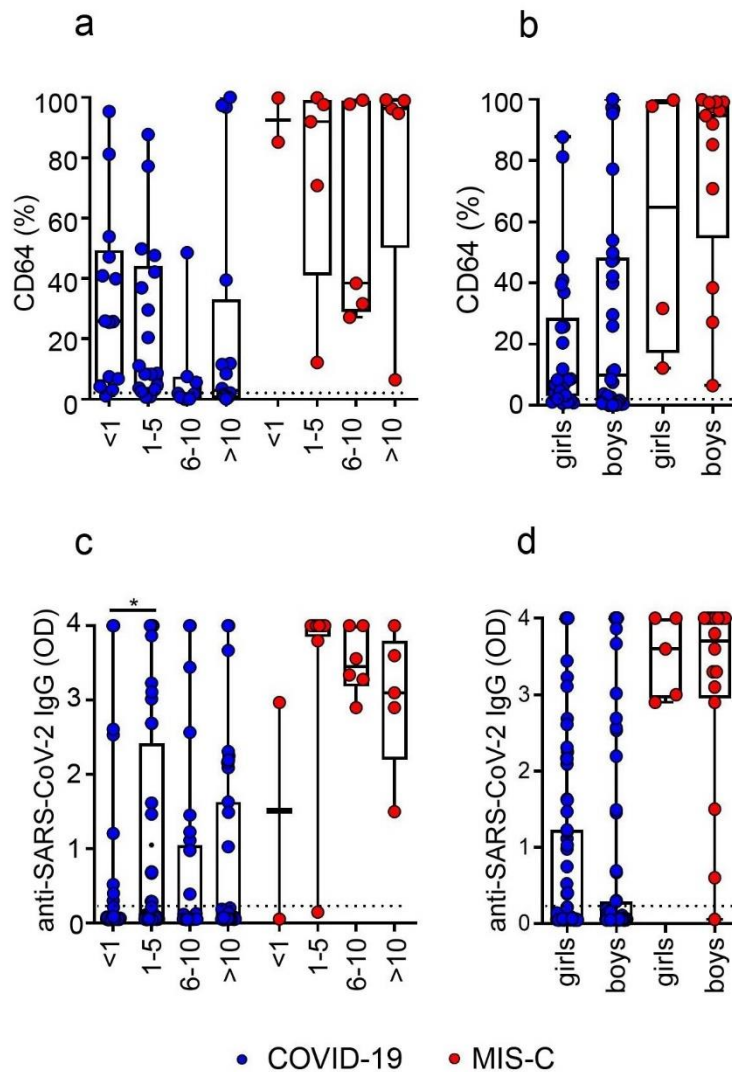

**Legend to Figure S3. Expression of CD64 in neutrophils and IgG levels directed to the spike protein of SARS-CoV-2 from children with COVID-19 and MIS-C divided according to their age and sex. (a-b)** CD64 expression in neutrophils from children with COVID-19 and MIS-C. **(a)** <1 year, n=14 and n=2; 1 to 5 years, n=18 and n=5; 6 to 10 years, n=8 and n=5; and >10 years, n=16 and n=5; for children with COVID-19 and MIS-C, respectively. **(b)** Girls, n=26 and n=4; boys, n=30 and n=13, for COVID-19 and MIS-C, respectively. Dotted line depicts the median expression of CD64 in neutrophils from healthy controls. **(c-d)** Plasma levels of IgG antibodies directed to SARS-CoV-2 spike protein in children with COVID-19 and MIS-C. **(c)** <1 year, n=46 and n=2; 1 to 5 years, n=52 and n=8; 6 to 10 years, n=33 and n=6; and >10 years, n=43 and n=5, for COVID-19 and MIS-C, respectively. **(d)** Girls, n=80 and n=5; boys, n=94 and n=16, for COVID-19 and MIS-C, respectively. Dotted line indicates the cut-off value. Median and min to max of n donors are shown in a-d. P values were determined by Kruskal-Wallis test and Mann-Whitney U test: \* p<0.05. COVID-19 (blue circle), MIS-C (red circle).
